# Supplementary material for: Declining Burden of Plasmodium vivax in a Population in Northwestern Thailand from 1995 to 2016 before Comprehensive Primaquine Prescription for Radical Cure
Source: PubMed Central journal article supplement (PMC6947798; doi:10.4269/ajtmh.19-0496), 2019-11-18
Supplement: tpmd190496.SD1.pdf [file tpmd190496.SD1.pdf]

Supplement Table 1. Incidence Risk Ratio (IRR) for malaria overall, *Plasmodium falciparum*, and *Plasmodium vivax* in females

|                              | IRR in males | IRR in females | 95% CI       | p-value |
|------------------------------|--------------|----------------|--------------|---------|
| Malaria overall              |              | 0.44           | 0.40 to 0.49 | <0.001  |
| <i>Plasmodium falciparum</i> | Reference    | 0.37           | 0.34 to 0.41 | <0.001  |
| <i>Plasmodium vivax</i>      |              | 0.54           | 0.50 to 0.59 | <0.001  |

Poisson regression was used to test for differences in trends over time, by age group and gender. Data were stratified by gender with an interaction term between year and age group.

Supplement Table 2. Incidence Risk Ratio (IRR) for *Plasmodium vivax* infection by age and time stratified by gender from 1995 to 2016 in refugee clinics and 1998 to 2016 in migrant clinics

| Age group   | Year      | IRR refugee male | 95% confidence interval | p-value | IRR refugee female | 95% confidence interval | p-value | IRR migrant male | 95% confidence interval | p-value | IRR migrant female | 95% confidence interval | p-value |
|-------------|-----------|------------------|-------------------------|---------|--------------------|-------------------------|---------|------------------|-------------------------|---------|--------------------|-------------------------|---------|
| 0-4 years   | 1995-1997 | Reference        |                         |         | Reference          |                         |         | Reference        |                         |         | Reference          |                         |         |
|             | 1998-2000 | 1.19             | 0.83 to 1.70            | 0.35    | 1.08               | 0.78 to 1.49            | 0.64    |                  |                         |         |                    |                         |         |
|             | 2001-2003 | 1.14             | 0.68 to 1.92            | 0.62    | 1.04               | 0.73 to 1.49            | 0.82    | 1.02             | 0.39 to 2.67            | 0.97    | 0.99               | 0.38 to 2.61            | 0.99    |
|             | 2004-2006 | 0.94             | 0.59 to 1.50            | 0.79    | 0.91               | 0.64 to 1.31            | 0.62    | 3.16             | 1.21 to 8.20            | 0.02    | 3.15               | 1.23 to 8.05            | 0.02    |
|             | 2007-2009 | 1.08             | 0.78 to 1.49            | 0.66    | 0.96               | 0.65 to 1.41            | 0.82    | 4.16             | 1.87 to 9.24            | <0.01   | 4.40               | 1.97 to 9.86            | <0.01   |
|             | 2010-2012 | 0.57             | 0.37 to 0.88            | 0.01    | 0.57               | 0.39 to 0.82            | <0.01   | 1.31             | 0.52 to 3.34            | 0.57    | 1.45               | 0.59 to 3.56            | 0.42    |
|             | 2013-2016 | 0.08             | 0.04 to 0.19            | <0.01   | 0.09               | 0.03 to 0.25            | <0.01   | 0.37             | 0.15 to 0.91            | 0.03    | 0.47               | 0.17 to 1.28            | 0.14    |
| 5-9 years   | 1995-1997 | 1.11             | 0.74 to 1.67            | 0.61    | 1.12               | 0.77 to 1.64            | 0.55    |                  |                         |         |                    |                         |         |
|             | 1998-2000 | 1.24             | 0.81 to 1.88            | 0.33    | 1.13               | 0.87 to 1.45            | 0.36    | 1.00             | 0.32 to 3.11            | 1.00    | 0.93               | 0.29 to 2.94            | 0.90    |
|             | 2001-2003 | 1.61             | 1.09 to 2.38            | 0.02    | 1.14               | 0.84 to 1.54            | 0.40    | 0.89             | 0.32 to 2.48            | 0.83    | 0.90               | 0.32 to 2.55            | 0.84    |
|             | 2004-2006 | 1.70             | 1.12 to 2.58            | 0.01    | 1.08               | 0.76 to 1.54            | 0.66    | 1.58             | 0.60 to 4.13            | 0.36    | 1.69               | 0.66 to 4.34            | 0.28    |
|             | 2007-2009 | 1.67             | 1.14 to 2.44            | 0.01    | 1.17               | 0.79 to 1.73            | 0.43    | 2.82             | 1.27 to 6.28            | 0.01    | 2.87               | 1.28 to 6.44            | 0.01    |
|             | 2010-2012 | 0.93             | 0.61 to 1.40            | 0.71    | 0.78               | 0.58 to 1.06            | 0.11    | 1.65             | 0.67 to 4.11            | 0.28    | 1.54               | 0.61 to 3.93            | 0.36    |
|             | 2013-2016 | 0.13             | 0.06 to 0.28            | <0.01   | 0.11               | 0.05 to 0.27            | <0.01   | 0.52             | 0.20 to 1.36            | 0.18    | 0.46               | 0.17 to 1.22            | 0.12    |
| 10-14 years | 1995-1997 | 1.05             | 0.66 to 1.67            | 0.83    | 0.96               | 0.70 to 1.32            | 0.81    |                  |                         |         |                    |                         |         |
|             | 1998-2000 | 1.40             | 0.89 to 2.22            | 0.15    | 0.89               | 0.56 to 1.42            | 0.64    | 0.70             | 0.23 to 2.15            | 0.53    | 0.80               | 0.25 to 2.59            | 0.71    |
|             | 2001-2003 | 2.13             | 1.53 to 2.96            | <0.01   | 1.15               | 0.87 to 1.51            | 0.34    | 0.54             | 0.17 to 1.73            | 0.30    | 0.66               | 0.22 to 1.99            | 0.46    |
|             | 2004-2006 | 2.48             | 1.54 to 4.01            | <0.01   | 1.27               | 0.82 to 1.98            | 0.28    | 1.48             | 0.59 to 3.70            | 0.40    | 1.31               | 0.52 to 3.31            | 0.57    |
|             | 2007-2009 | 3.13             | 2.01 to 4.86            | <0.01   | 1.58               | 1.10 to 2.26            | 0.01    | 2.32             | 1.03 to 5.18            | 0.04    | 2.01               | 0.89 to 4.52            | 0.09    |
|             | 2010-2012 | 1.59             | 1.07 to 2.38            | 0.02    | 0.83               | 0.56 to 1.22            | 0.34    | 1.92             | 0.83 to 4.43            | 0.13    | 1.30               | 0.53 to 3.18            | 0.56    |
|             | 2013-2016 | 0.29             | 0.13 to 0.67            | <0.01   | 0.12               | 0.05 to 0.31            | <0.01   | 0.69             | 0.27 to 1.73            | 0.43    | 0.52               | 0.21 to 1.31            | 0.17    |
| 15-19 years | 1995-1997 | 1.85             | 1.06 to 3.25            | 0.03    | 0.77               | 0.53 to 1.12            | 0.17    |                  |                         |         |                    |                         |         |
|             | 1998-2000 | 2.53             | 1.66 to 3.86            | <0.01   | 0.86               | 0.56 to 1.33            | 0.50    | 1.16             | 0.37 to 3.69            | 0.80    | 0.56               | 0.18 to 1.74            | 0.32    |
|             | 2001-2003 | 2.76             | 1.85 to 4.12            | <0.01   | 1.06               | 0.73 to 1.53            | 0.77    | 0.95             | 0.26 to 3.42            | 0.93    | 0.45               | 0.16 to 1.26            | 0.13    |
|             | 2004-2006 | 2.62             | 1.74 to 3.97            | <0.01   | 0.75               | 0.51 to 1.10            | 0.15    | 2.07             | 0.77 to 5.54            | 0.15    | 0.91               | 0.36 to 2.31            | 0.85    |
|             | 2007-2009 | 3.77             | 2.59 to 5.49            | <0.01   | 1.06               | 0.71 to 1.59            | 0.76    | 3.35             | 1.50 to 7.51            | <0.01   | 1.69               | 0.75 to 3.79            | 0.21    |
|             | 2010-2012 | 2.30             | 1.57 to 3.36            | <0.01   | 0.70               | 0.49 to 1.00            | 0.05    | 2.36             | 0.98 to 5.70            | 0.06    | 1.04               | 0.41 to 2.62            | 0.93    |
|             | 2013-2016 | 0.39             | 0.18 to 0.86            | 0.02    | 0.11               | 0.04 to 0.32            | <0.01   | 0.77             | 0.29 to 2.08            | 0.61    | 0.35               | 0.13 to 0.98            | 0.05    |
| 20-24 years | 1995-1997 | 1.46             | 0.84 to 2.54            | 0.18    | 0.53               | 0.33 to 0.84            | 0.01    |                  |                         |         |                    |                         |         |
|             | 1998-2000 | 1.72             | 1.09 to 2.71            | 0.02    | 0.48               | 0.32 to 0.73            | <0.01   | 1.21             | 0.37 to 3.90            | 0.75    | 0.46               | 0.15 to 1.41            | 0.17    |
|             | 2001-2003 | 2.08             | 1.38 to 3.14            | <0.01   | 0.61               | 0.43 to 0.87            | 0.01    | 0.86             | 0.24 to 3.05            | 0.81    | 0.39               | 0.11 to 1.31            | 0.13    |
|             | 2004-2006 | 1.68             | 1.05 to 2.70            | 0.03    | 0.40               | 0.29 to 0.56            | <0.01   | 2.08             | 0.78 to 5.58            | 0.14    | 0.69               | 0.27 to 1.76            | 0.44    |
|             | 2007-2009 | 2.31             | 1.63 to 3.29            | <0.01   | 0.47               | 0.33 to 0.67            | <0.01   | 3.37             | 1.51 to 7.53            | <0.01   | 1.19               | 0.51 to 2.74            | 0.69    |
|             | 2010-2012 | 1.29             | 0.87 to 1.92            | 0.21    | 0.32               | 0.23 to 0.44            | <0.01   | 2.19             | 0.87 to 5.52            | 0.10    | 0.72               | 0.26 to 2.02            | 0.53    |
|             | 2013-2016 | 0.20             | 0.09 to 0.45            | <0.01   | 0.05               | 0.02 to 0.12            | <0.01   | 0.50             | 0.19 to 1.29            | 0.15    | 0.18               | 0.07 to 0.48            | <0.01   |
| 25-29 years | 1995-1997 | 0.77             | 0.44 to 1.35            | 0.36    | 0.40               | 0.25 to 0.63            | <0.01   |                  |                         |         |                    |                         |         |
|             | 1998-2000 | 1.03             | 0.68 to 1.56            | 0.90    | 0.33               | 0.24 to 0.46            | <0.01   | 0.71             | 0.22 to 2.27            | 0.57    | 0.40               | 0.13 to 1.27            | 0.12    |
|             | 2001-2003 | 1.45             | 0.98 to 2.14            | 0.06    | 0.40               | 0.30 to 0.53            | <0.01   | 0.53             | 0.14 to 2.03            | 0.35    | 0.35               | 0.11 to 1.08            | 0.07    |
|             | 2004-2006 | 1.13             | 0.70 to 1.82            | 0.62    | 0.32               | 0.24 to 0.42            | <0.01   | 1.31             | 0.47 to 3.65            | 0.61    | 0.53               | 0.21 to 1.32            | 0.17    |
|             | 2007-2009 | 1.45             | 1.04 to 2.03            | 0.03    | 0.34               | 0.25 to 0.45            | <0.01   | 2.29             | 1.02 to 5.16            | 0.05    | 0.89               | 0.39 to 2.03            | 0.78    |
|             | 2010-2012 | 0.86             | 0.57 to 1.31            | 0.48    | 0.21               | 0.14 to 0.30            | <0.01   | 1.51             | 0.60 to 3.79            | 0.38    | 0.63               | 0.23 to 1.68            | 0.35    |
|             | 2013-2016 | 0.15             | 0.06 to 0.38            | <0.01   | 0.04               | 0.01 to 0.09            | <0.01   | 0.34             | 0.12 to 1.02            | 0.05    | 0.15               | 0.06 to 0.38            | <0.01   |
| 30-34 years | 1995-1997 | 0.41             | 0.21 to 0.79            | 0.01    | 0.28               | 0.20 to 0.38            | <0.01   |                  |                         |         |                    |                         |         |
|             | 1998-2000 | 0.57             | 0.32 to 1.04            | 0.07    | 0.29               | 0.19 to 0.45            | <0.01   | 0.44             | 0.14 to 1.42            | 0.17    | 0.38               | 0.12 to 1.14            | 0.09    |
|             | 2001-2003 | 0.88             | 0.58 to 1.32            | 0.53    | 0.30               | 0.23 to 0.39            | <0.01   | 0.41             | 0.12 to 1.42            | 0.16    | 0.33               | 0.11 to 1.01            | 0.05    |
|             | 2004-2006 | 0.82             | 0.56 to 1.20            | 0.30    | 0.30               | 0.24 to 0.39            | <0.01   | 0.82             | 0.31 to 2.19            | 0.70    | 0.58               | 0.24 to 1.40            | 0.23    |
|             | 2007-2009 | 0.85             | 0.57 to 1.28            | 0.44    | 0.31               | 0.20 to 0.47            | <0.01   | 1.55             | 0.69 to 3.52            | 0.29    | 0.77               | 0.33 to 1.76            | 0.53    |
|             | 2010-2012 | 0.56             | 0.38 to 0.82            | <0.01   | 0.17               | 0.12 to 0.22            | <0.01   | 1.11             | 0.45 to 2.73            | 0.83    | 0.54               | 0.21 to 1.41            | 0.21    |
|             | 2013-2016 | 0.10             | 0.05 to 0.23            | <0.01   | 0.04               | 0.01 to 0.09            | <0.01   | 0.25             | 0.09 to 0.67            | 0.01    | 0.12               | 0.04 to 0.35            | <0.01   |
| 35-39 years | 1995-1997 | 0.21             | 0.13 to 0.36            | <0.01   | 0.25               | 0.17 to 0.35            | <0.01   |                  |                         |         |                    |                         |         |
|             | 1998-2000 | 0.35             | 0.18 to 0.67            | <0.01   | 0.24               | 0.15 to 0.37            | <0.01   | 0.32             | 0.10 to 1.02            | 0.05    | 0.24               | 0.07 to 0.76            | 0.02    |
|             | 2001-2003 | 0.42             | 0.30 to 0.60            | <0.01   | 0.28               | 0.18 to 0.44            | <0.01   | 0.33             | 0.09 to 1.25            | 0.10    | 0.23               | 0.07 to 0.71            | 0.01    |
|             | 2004-2006 | 0.50             | 0.26 to 0.96            | 0.04    | 0.29               | 0.18 to 0.45            | <0.01   | 0.61             | 0.21 to 1.80            | 0.38    | 0.41               | 0.16 to 1.06            | 0.07    |
|             | 2007-2009 | 0.63             | 0.43 to 0.94            | 0.02    | 0.27               | 0.16 to 0.46            | <0.01   | 1.19             | 0.53 to 2.66            | 0.67    | 0.62               | 0.27 to 1.42            | 0.26    |
|             | 2010-2012 | 0.38             | 0.28 to 0.52            | <0.01   | 0.15               | 0.10 to 0.23            | <0.01   | 0.83             | 0.33 to 2.12            | 0.70    | 0.52               | 0.21 to 1.28            | 0.15    |
|             | 2013-2016 | 0.07             | 0.03 to 0.18            | <0.01   | 0.04               | 0.01 to 0.11            | <0.01   | 0.23             | 0.09 to 0.61            | <0.01   | 0.12               | 0.04 to 0.34            | <0.01   |
| ≥ 40 years  | 1995-1997 | 0.31             | 0.17 to 0.55            | <0.01   | 0.51               | 0.33 to 0.81            | <0.01   |                  |                         |         |                    |                         |         |
|             | 1998-2000 | 0.49             | 0.30 to 0.78            | <0.01   | 0.54               | 0.37 to 0.79            | <0.01   | 0.46             | 0.15 to 1.41            | 0.17    | 0.50               | 0.15 to 1.61            | 0.25    |
|             | 2001-2003 | 0.71             | 0.51 to 0.98            | 0.04    | 0.64               | 0.48 to 0.87            | <0.01   | 0.43             | 0.12 to 1.55            | 0.20    | 0.49               | 0.14 to 1.66            | 0.25    |
|             | 2004-2006 | 0.83             | 0.55 to 1.24            | 0.37    | 0.63               | 0.44 to 0.90            | 0.01    | 0.96             | 0.37 to 2.48            | 0.93    | 0.94               | 0.37 to 2.38            | 0.90    |
|             | 2007-2009 | 1.04             | 0.70 to 1.54            | 0.86    | 0.89               | 0.60 to 1.31            | 0.54    | 1.74             | 0.76 to 3.95            | 0.19    | 1.77               | 0.76 to 4.13            | 0.19    |
|             | 2010-2012 | 0.70             | 0.47 to 1.02            | 0.07    | 0.60               | 0.43 to 0.84            | <0.01   | 1.51             | 0.62 to 3.68            | 0.36    | 1.25               | 0.51 to 3.07            | 0.63    |
|             | 2013-2016 | 0.13             | 0.06 to 0.30            | <0.01   | 0.10               | 0.04 to 0.27            | <0.01   | 0.44             | 0.17 to 1.17            | 0.10    | 0.38               | 0.14 to 0.99            | 0.05    |

Poisson regression was used to test for differences in trends over time, by age group, gender, and migratory status. Data were stratified by gender with an interaction term between year and age group.

Supplement Table 3. Incidence Risk Ratio (IRR) for *Plasmodium falciparum* infection by age and time stratified by gender from 1995 to 2016 in refugee clinics and 1998 to 2016 in migrant clinics

| Age group   | Year      | IRR refugee male | 95% confidence interval | p-value | IRR refugee female | 95% confidence interval | p-value | IRR migrant male | 95% confidence interval | p-value | IRR migrant female | 95% confidence interval | p-value |
|-------------|-----------|------------------|-------------------------|---------|--------------------|-------------------------|---------|------------------|-------------------------|---------|--------------------|-------------------------|---------|
| 0-4 years   | 1995-1997 | Reference        |                         |         | Reference          |                         |         | Reference        |                         |         | Reference          |                         |         |
|             | 1998-2000 | 1.45             | 1.10 to 1.89            | 0.01    | 1.53               | 1.03 to 2.28            | 0.03    |                  |                         |         |                    |                         |         |
|             | 2001-2003 | 1.23             | 0.96 to 1.59            | 0.11    | 1.37               | 0.95 to 1.98            | 0.09    | 1.24             | 0.57 to 2.70            | 0.58    | 1.43               | 0.63 to 3.23            | 0.39    |
|             | 2004-2006 | 1.17             | 0.91 to 1.51            | 0.23    | 1.19               | 0.83 to 1.72            | 0.35    | 2.47             | 1.06 to 5.75            | 0.04    | 2.28               | 0.95 to 5.48            | 0.07    |
|             | 2007-2009 | 0.74             | 0.56 to 0.98            | 0.03    | 0.65               | 0.43 to 0.97            | 0.04    | 1.96             | 0.92 to 4.17            | 0.08    | 2.05               | 0.93 to 4.53            | 0.08    |
|             | 2010-2012 | 0.42             | 0.27 to 0.64            | <0.01   | 0.30               | 0.16 to 0.56            | <0.01   | 0.69             | 0.33 to 1.43            | 0.32    | 0.64               | 0.29 to 1.40            | 0.27    |
|             | 2013-2016 | 0.03             | 0.01 to 0.07            | <0.01   | 0.02               | 0.00 to 0.06            | <0.01   | 0.07             | 0.01 to 0.34            | <0.01   | 0.10               | 0.02 to 0.41            | <0.01   |
| 5-9 years   | 1995-1997 | 0.97             | 0.77 to 1.21            | 0.78    | 1.02               | 0.71 to 1.46            | 0.91    |                  |                         |         |                    |                         |         |
|             | 1998-2000 | 1.63             | 1.14 to 2.33            | 0.01    | 1.66               | 1.05 to 2.63            | 0.03    | 1.35             | 0.48 to 3.80            | 0.57    | 1.15               | 0.39 to 3.43            | 0.80    |
|             | 2001-2003 | 1.50             | 1.12 to 2.02            | 0.01    | 1.34               | 0.91 to 1.97            | 0.14    | 2.06             | 0.93 to 4.60            | 0.08    | 1.65               | 0.73 to 3.72            | 0.23    |
|             | 2004-2006 | 1.73             | 1.31 to 2.28            | <0.01   | 1.43               | 1.00 to 2.05            | 0.05    | 3.39             | 1.41 to 8.14            | 0.01    | 3.15               | 1.32 to 7.55            | 0.01    |
|             | 2007-2009 | 1.08             | 0.76 to 1.53            | 0.68    | 0.76               | 0.52 to 1.10            | 0.14    | 3.62             | 1.70 to 7.70            | <0.01   | 3.01               | 1.36 to 6.65            | 0.01    |
|             | 2010-2012 | 0.66             | 0.42 to 1.02            | 0.06    | 0.52               | 0.28 to 0.95            | 0.04    | 1.16             | 0.55 to 2.47            | 0.69    | 1.02               | 0.45 to 2.31            | 0.97    |
|             | 2013-2016 | 0.04             | 0.01 to 0.13            | <0.01   | 0.03               | 0.01 to 0.09            | <0.01   | 0.15             | 0.03 to 0.73            | 0.02    | 0.15               | 0.03 to 0.70            | 0.02    |
| 10-14 years | 1995-1997 | 1.40             | 1.00 to 1.96            | 0.05    | 1.00               | 0.67 to 1.49            | 1.00    |                  |                         |         |                    |                         |         |
|             | 1998-2000 | 2.18             | 1.54 to 3.08            | <0.01   | 1.49               | 0.89 to 2.49            | 0.13    | 1.27             | 0.43 to 3.77            | 0.66    | 1.24               | 0.42 to 3.69            | 0.70    |
|             | 2001-2003 | 2.26             | 1.78 to 2.87            | <0.01   | 1.37               | 0.95 to 1.97            | 0.10    | 1.86             | 0.81 to 4.28            | 0.14    | 1.65               | 0.70 to 3.89            | 0.26    |
|             | 2004-2006 | 3.00             | 2.15 to 4.19            | <0.01   | 1.43               | 0.96 to 2.15            | 0.08    | 4.54             | 1.90 to 10.8            | <0.01   | 3.73               | 1.54 to 9.05            | <0.01   |
|             | 2007-2009 | 2.01             | 1.51 to 2.68            | <0.01   | 1.01               | 0.71 to 1.44            | 0.95    | 4.78             | 2.24 to 10.2            | <0.01   | 3.62               | 1.58 to 8.27            | <0.01   |
|             | 2010-2012 | 1.07             | 0.74 to 1.57            | 0.71    | 0.58               | 0.30 to 1.09            | 0.09    | 1.73             | 0.82 to 3.65            | 0.15    | 0.97               | 0.43 to 2.22            | 0.95    |
|             | 2013-2016 | 0.11             | 0.03 to 0.43            | <0.01   | 0.04               | 0.01 to 0.14            | <0.01   | 0.21             | 0.05 to 0.92            | 0.04    | 0.13               | 0.03 to 0.59            | 0.01    |
| 15-19 years | 1995-1997 | 3.62             | 2.14 to 6.13            | <0.01   | 1.10               | 0.75 to 1.61            | 0.62    |                  |                         |         |                    |                         |         |
|             | 1998-2000 | 4.89             | 3.22 to 7.43            | <0.01   | 1.66               | 0.98 to 2.81            | 0.06    | 2.90             | 1.01 to 8.38            | 0.05    | 1.06               | 0.37 to 3.06            | 0.91    |
|             | 2001-2003 | 4.25             | 2.73 to 6.61            | <0.01   | 1.42               | 0.89 to 2.27            | 0.15    | 3.86             | 1.70 to 8.79            | <0.01   | 1.22               | 0.51 to 2.93            | 0.66    |
|             | 2004-2006 | 4.14             | 3.00 to 5.70            | <0.01   | 1.30               | 0.92 to 1.84            | 0.14    | 8.11             | 3.33 to 19.8            | <0.01   | 3.01               | 1.20 to 7.53            | 0.02    |
|             | 2007-2009 | 2.70             | 1.92 to 3.78            | <0.01   | 0.83               | 0.54 to 1.27            | 0.39    | 8.24             | 3.63 to 18.7            | <0.01   | 3.21               | 1.40 to 7.32            | 0.01    |
|             | 2010-2012 | 1.73             | 1.12 to 2.67            | 0.01    | 0.45               | 0.33 to 0.62            | <0.01   | 2.87             | 1.31 to 6.26            | 0.01    | 1.00               | 0.45 to 2.21            | 0.99    |
|             | 2013-2016 | 0.12             | 0.03 to 0.47            | <0.01   | 0.03               | 0.01 to 0.14            | <0.01   | 0.28             | 0.06 to 1.24            | 0.09    | 0.11               | 0.02 to 0.49            | <0.01   |
| 20-24 years | 1995-1997 | 3.50             | 2.11 to 5.80            | <0.01   | 0.93               | 0.60 to 1.42            | 0.72    |                  |                         |         |                    |                         |         |
|             | 1998-2000 | 4.55             | 2.93 to 7.06            | <0.01   | 0.97               | 0.61 to 1.54            | 0.88    | 3.22             | 1.10 to 9.41            | 0.03    | 0.90               | 0.31 to 2.60            | 0.84    |
|             | 2001-2003 | 4.49             | 3.01 to 6.69            | <0.01   | 1.06               | 0.70 to 1.61            | 0.78    | 4.24             | 1.88 to 9.59            | <0.01   | 0.98               | 0.40 to 2.41            | 0.97    |
|             | 2004-2006 | 3.78             | 2.76 to 5.18            | <0.01   | 0.86               | 0.60 to 1.24            | 0.42    | 9.01             | 3.53 to 23.0            | <0.01   | 2.26               | 0.94 to 5.39            | 0.07    |
|             | 2007-2009 | 2.32             | 1.77 to 3.05            | <0.01   | 0.43               | 0.31 to 0.61            | <0.01   | 9.28             | 4.12 to 20.9            | <0.01   | 1.95               | 0.82 to 4.63            | 0.13    |
|             | 2010-2012 | 1.44             | 0.94 to 2.20            | 0.10    | 0.31               | 0.20 to 0.45            | <0.01   | 2.94             | 1.30 to 6.67            | 0.01    | 0.63               | 0.27 to 1.46            | 0.28    |
|             | 2013-2016 | 0.09             | 0.03 to 0.26            | <0.01   | 0.02               | 0.00 to 0.07            | <0.01   | 0.24             | 0.05 to 1.04            | 0.06    | 0.06               | 0.02 to 0.23            | <0.01   |
| 25-29 years | 1995-1997 | 2.42             | 1.47 to 3.97            | <0.01   | 0.63               | 0.39 to 1.03            | 0.07    |                  |                         |         |                    |                         |         |
|             | 1998-2000 | 3.46             | 2.13 to 5.61            | <0.01   | 0.77               | 0.45 to 1.33            | 0.35    | 2.42             | 0.81 to 7.25            | 0.11    | 0.75               | 0.26 to 2.17            | 0.60    |
|             | 2001-2003 | 3.64             | 2.42 to 5.47            | <0.01   | 0.79               | 0.57 to 1.10            | 0.17    | 2.93             | 1.29 to 6.66            | 0.01    | 0.80               | 0.34 to 1.90            | 0.62    |
|             | 2004-2006 | 3.09             | 2.25 to 4.24            | <0.01   | 0.67               | 0.48 to 0.92            | 0.01    | 6.84             | 2.77 to 16.9            | <0.01   | 1.83               | 0.75 to 4.48            | 0.19    |
|             | 2007-2009 | 1.88             | 1.37 to 2.58            | <0.01   | 0.31               | 0.19 to 0.51            | <0.01   | 7.64             | 3.44 to 17.0            | <0.01   | 1.67               | 0.74 to 3.76            | 0.22    |
|             | 2010-2012 | 1.14             | 0.75 to 1.72            | 0.55    | 0.18               | 0.13 to 0.26            | <0.01   | 2.51             | 1.10 to 5.71            | 0.03    | 0.43               | 0.17 to 1.06            | 0.07    |
|             | 2013-2016 | 0.07             | 0.02 to 0.29            | <0.01   | 0.01               | 0.00 to 0.06            | <0.01   | 0.19             | 0.04 to 0.89            | 0.04    | 0.06               | 0.01 to 0.24            | <0.01   |
| 30-34 years | 1995-1997 | 1.38             | 0.83 to 2.29            | 0.22    | 0.46               | 0.31 to 0.67            | <0.01   |                  |                         |         |                    |                         |         |
|             | 1998-2000 | 2.50             | 1.60 to 3.90            | <0.01   | 0.68               | 0.40 to 1.15            | 0.15    | 1.60             | 0.55 to 4.63            | 0.38    | 0.65               | 0.23 to 1.85            | 0.42    |
|             | 2001-2003 | 2.83             | 1.91 to 4.20            | <0.01   | 0.66               | 0.46 to 0.94            | 0.02    | 2.47             | 1.06 to 5.74            | 0.04    | 0.78               | 0.33 to 1.85            | 0.57    |
|             | 2004-2006 | 2.44             | 1.75 to 3.38            | <0.01   | 0.66               | 0.48 to 0.89            | 0.01    | 4.96             | 2.03 to 12.1            | <0.01   | 1.73               | 0.73 to 4.13            | 0.22    |
|             | 2007-2009 | 1.32             | 0.91 to 1.91            | 0.14    | 0.39               | 0.21 to 0.73            | <0.01   | 5.63             | 2.57 to 12.3            | <0.01   | 1.42               | 0.63 to 3.21            | 0.40    |
|             | 2010-2012 | 0.81             | 0.52 to 1.24            | 0.33    | 0.19               | 0.13 to 0.29            | <0.01   | 1.85             | 0.85 to 4.04            | 0.12    | 0.46               | 0.20 to 1.05            | 0.07    |
|             | 2013-2016 | 0.08             | 0.03 to 0.26            | <0.01   | 0.01               | 0.00 to 0.06            | <0.01   | 0.16             | 0.03 to 0.94            | 0.04    | 0.05               | 0.01 to 0.24            | <0.01   |
| 35-39 years | 1995-1997 | 0.92             | 0.55 to 1.53            | 0.75    | 0.36               | 0.23 to 0.55            | <0.01   |                  |                         |         |                    |                         |         |
|             | 1998-2000 | 1.65             | 1.05 to 2.61            | 0.03    | 0.43               | 0.28 to 0.66            | <0.01   | 1.03             | 0.34 to 3.14            | 0.95    | 0.46               | 0.15 to 1.37            | 0.16    |
|             | 2001-2003 | 1.81             | 1.28 to 2.56            | <0.01   | 0.60               | 0.42 to 0.84            | <0.01   | 1.61             | 0.72 to 3.59            | 0.25    | 0.74               | 0.32 to 1.70            | 0.48    |
|             | 2004-2006 | 1.85             | 1.23 to 2.77            | <0.01   | 0.62               | 0.42 to 0.90            | 0.01    | 4.28             | 1.71 to 10.7            | <0.01   | 1.45               | 0.59 to 3.57            | 0.42    |
|             | 2007-2009 | 1.03             | 0.76 to 1.40            | 0.84    | 0.35               | 0.25 to 0.48            | <0.01   | 4.17             | 1.92 to 9.05            | <0.01   | 1.52               | 0.67 to 3.46            | 0.31    |
|             | 2010-2012 | 0.63             | 0.37 to 1.06            | 0.08    | 0.18               | 0.11 to 0.29            | <0.01   | 1.73             | 0.79 to 3.75            | 0.17    | 0.44               | 0.19 to 0.98            | 0.05    |
|             | 2013-2016 | 0.04             | 0.01 to 0.14            | <0.01   | 0.02               | 0.00 to 0.10            | <0.01   | 0.16             | 0.03 to 0.80            | 0.03    | 0.06               | 0.01 to 0.25            | <0.01   |
| ≥ 40 years  | 1995-1997 | 1.30             | 0.78 to 2.18            | 0.31    | 0.89               | 0.51 to 1.52            | 0.66    |                  |                         |         |                    |                         |         |
|             | 1998-2000 | 2.58             | 1.63 to 4.08            | <0.01   | 1.50               | 0.91 to 2.46            | 0.11    | 1.73             | 0.59 to 5.01            | 0.32    | 1.21               | 0.42 to 3.43            | 0.73    |
|             | 2001-2003 | 2.94             | 2.09 to 4.12            | <0.01   | 1.62               | 1.04 to 2.53            | 0.03    | 2.60             | 1.18 to 5.73            | 0.02    | 1.68               | 0.71 to 3.98            | 0.24    |
|             | 2004-2006 | 3.59             | 2.40 to 5.38            | <0.01   | 1.81               | 1.28 to 2.58            | <0.01   | 7.00             | 2.82 to 17.4            | <0.01   | 4.09               | 1.68 to 9.92            | <0.01   |
|             | 2007-2009 | 2.23             | 1.59 to 3.13            | <0.01   | 1.15               | 0.79 to 1.68            | 0.46    | 7.22             | 3.32 to 15.7            | <0.01   | 3.85               | 1.73 to 8.55            | <0.01   |
|             | 2010-2012 | 1.48             | 1.00 to 2.18            | 0.05    | 0.78               | 0.50 to 1.22            | 0.28    | 2.99             | 1.38 to 6.46            | 0.01    | 1.41               | 0.64 to 3.13            | 0.40    |
|             | 2013-2016 | 0.10             | 0.02 to 0.41            | <0.01   | 0.04               | 0.01 to 0.17            | <0.01   | 0.40             | 0.09 to 1.85            | 0.24    | 0.17               | 0.03 to 0.86            | 0.03    |

Poisson regression was used to test for differences in trends over time, by age group, gender, and migratory status. Data were stratified by gender with an interaction term between year and age group.
